# Supplementary material for: Blackcurrant Alleviates Dextran Sulfate Sodium (DSS)-Induced Colitis in Mice
Source: MDPI journal article supplement (doi:10.3390/foods12051073), 2023-03-02
Supplement: s1 [file s1]

## Supplementary Materials

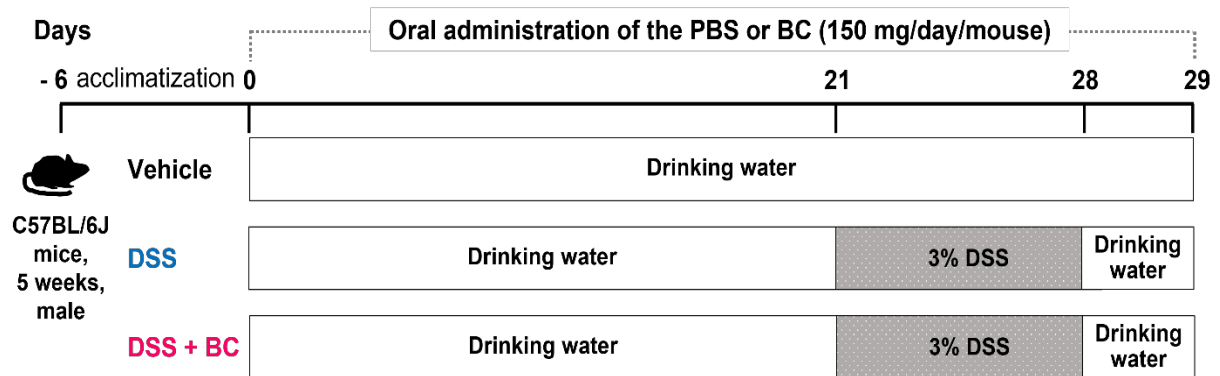

**Figure S1.** Experimental design. The experiment was performed for 29 days by dividing into the Vehicle group, DSS group, and DSS + Blackcurrant (BC) group. The sample was administered twice daily by oral administration to mice. The Vehicle group and the DSS group were given PBS whereas the DSS+BC group was given a freeze-dried Blackcurrant powder. After 21 days, colitis was induced for 6 days by 3% DSS in drinking water. Fecal was collected after DSS exposure.
